# Supplementary material for: A pH and redox dual responsive homopolypeptide: synthesis, characterization, and application in “smart” single-walled carbon nanotube dispersion
Source: Royal Society of Chemistry journal article supplement (doi:10.1039/c7py01393k), 2017-01-01
Supplement: c7py01393k1.pdf [file c7py01393k1.pdf]

Supporting Information

**pH and Redox Dual Responsive Homopolyptide: Synthesis, Characterization,  
and Application in “Smart” Single-Walled Carbon Nanotube Dispersion**

Jiang Xiao,<sup>1</sup> Junyan Tan,<sup>2</sup> Rujian Jiang,<sup>3</sup> Xiongliang He,<sup>1</sup> Yanzhi Xu,<sup>1</sup> Ying Ling,<sup>\*,1</sup>

Shifang Luan,<sup>3</sup> and Haoyu Tang<sup>\*,1</sup>

*<sup>1</sup>Key Laboratory of Polymeric Materials and Application Technology of Hunan Province, Key Laboratory of Advanced Functional Polymer Materials of Colleges and Universities of Hunan Province, College of Chemistry, Xiangtan University, Xiangtan, Hunan, 411105, China*

*<sup>2</sup>Beijing National Laboratory for Molecular Sciences, Key Laboratory of Polymer Chemistry and Physics of Ministry of Education, College of Chemistry and Molecular Engineering, Peking University, Beijing 100871, China*

*<sup>3</sup>State Key Laboratory of Polymer Physics and Chemistry, Changchun Institute of Applied Chemistry, Chinese Academy of Sciences, Changchun 130022, China*

Correspondence to: Haoyu Tang (Email: [htang@xtu.edu.cn](mailto:htang@xtu.edu.cn)), Ying Ling (Email: [yingling0202@xtu.edu.cn](mailto:yingling0202@xtu.edu.cn))

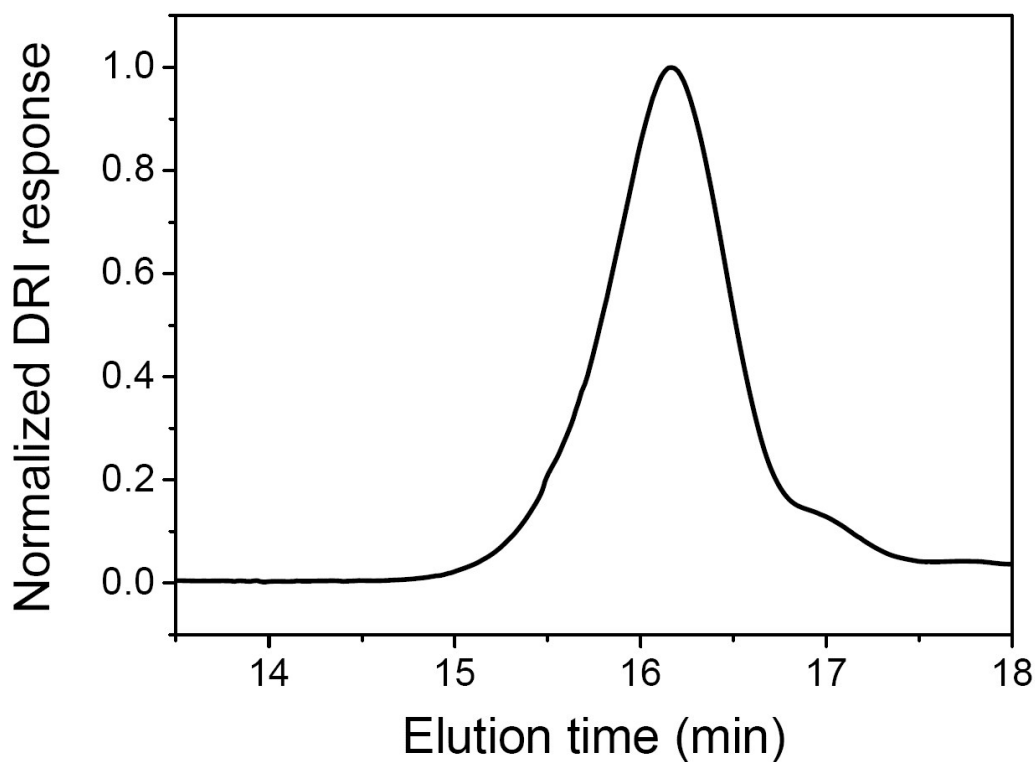

**Figure S1.** GPC chromatograph of PMCELC prepared from ring-opening polymerization ( $[M]_0/[I]_0 = 30$ ).

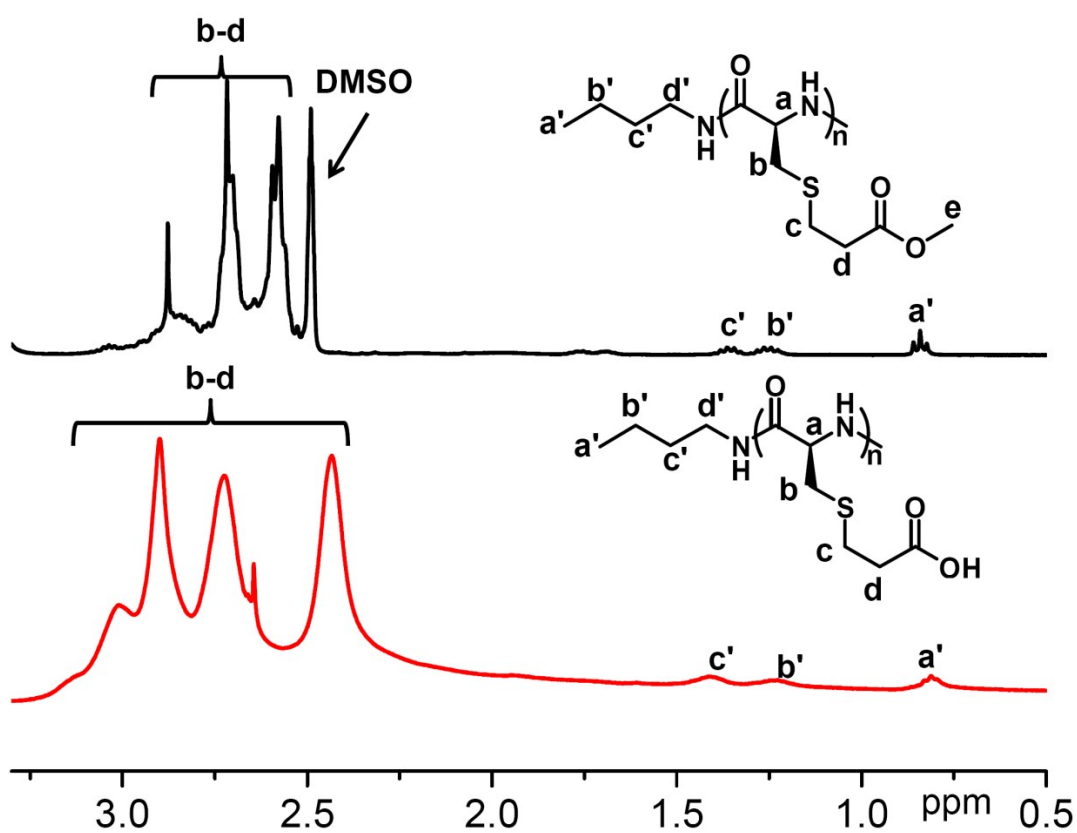

**Figure S2.**  $^1\text{H}$  NMR spectra of PMCELC in  $\text{DMSO-}d_6$  and PCELC in  $\text{D}_2\text{O}$  for the calculation of  $\text{DP}_{\text{NMR}}$ .

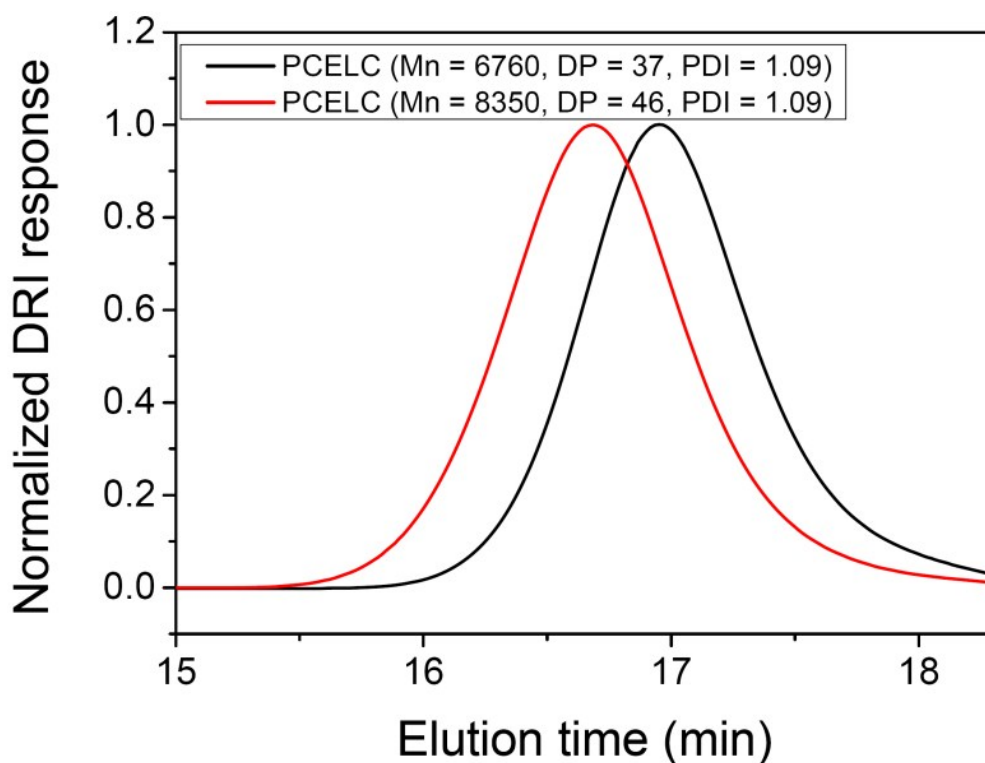

**Figure S3.** GPC chromatographs of PCELC samples with different  $M_n$  prepared from ring-opening polymerization of MCELC-NCA with different initial  $[M]_0/[I]_0$  ratios (i.e., 20 and 30) and subsequent hydrolyzation.

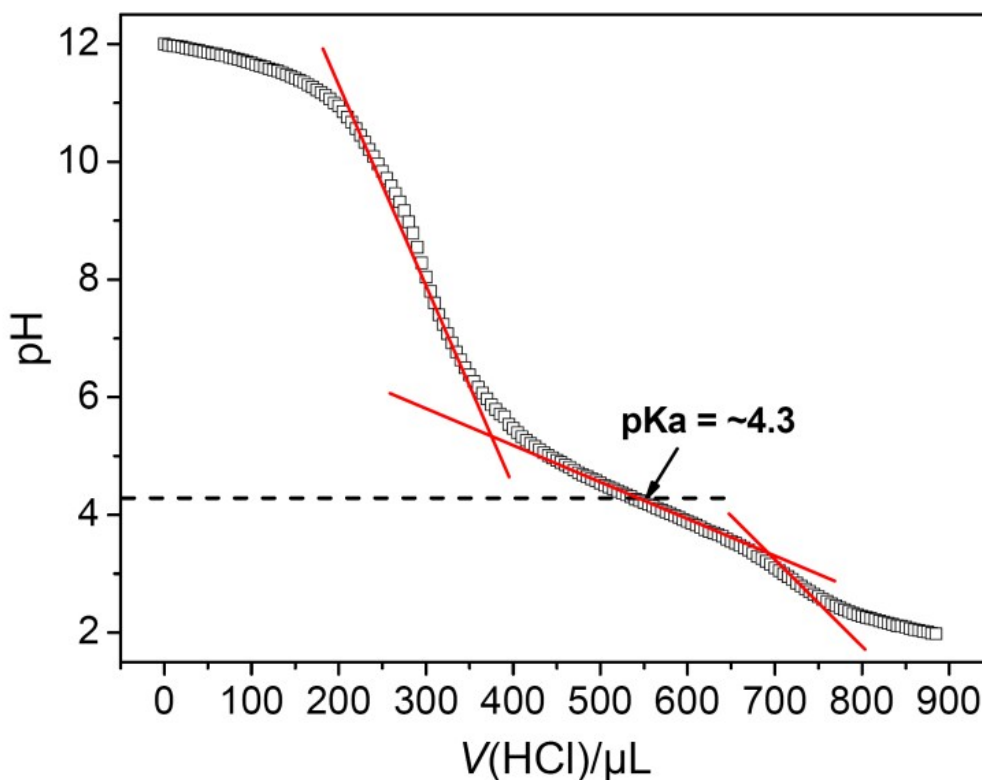

**Figure S4.** pH titration curve of PCELC ( $pK_a$  was determined from the midpoint of the buffering region).

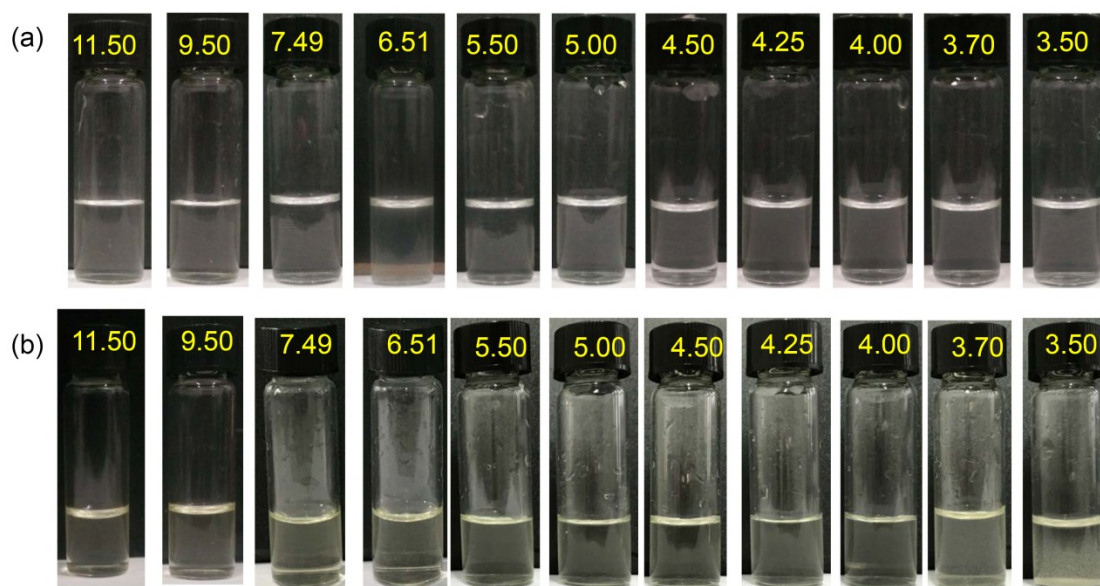

**Figure S5.** Optical images of PCELC<sup>ox</sup> and PCELC<sup>re</sup> aqueous solutions with different pH values (polymer concentration = 10 mg·mL<sup>-1</sup>).

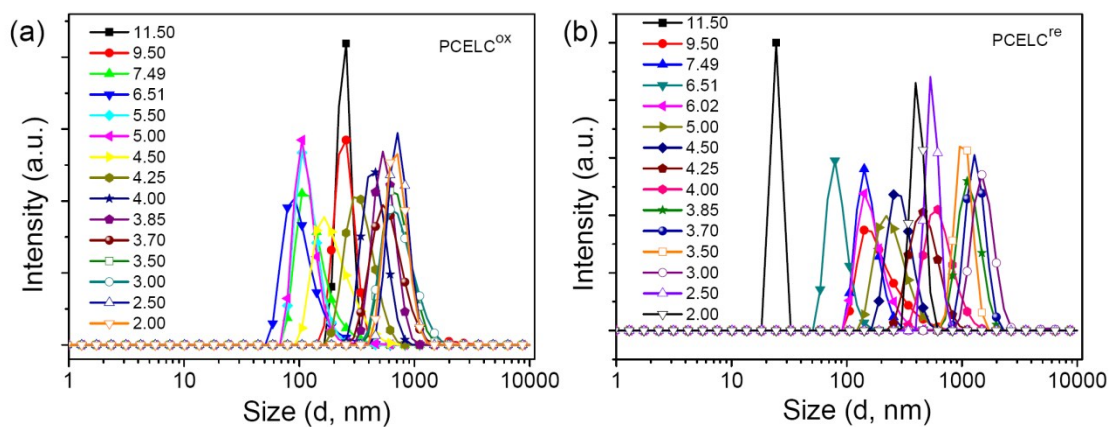

**Figure S6.** DLS size distribution plots of PCELC<sup>ox</sup> and PCELC<sup>re</sup> aqueous solutions with different pH values at 25 °C (polymer concentration = 1 mg·mL<sup>-1</sup>).
